# Supplementary material for: Investigating correlates of athletic identity and sport-related injury outcomes: a scoping review
Source: HighWire-hosted journal article supplement (doi:10.1136/bmjopen-2020-044199), 2021-04-01
Supplement: bmjopen-2020-044199supp001_data_supplement.pdf [file bmjopen-2020-044199supp001_data_supplement.pdf]

## Appendix 1

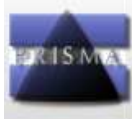

Figure 1. PRISMA 2009 Flow Diagram

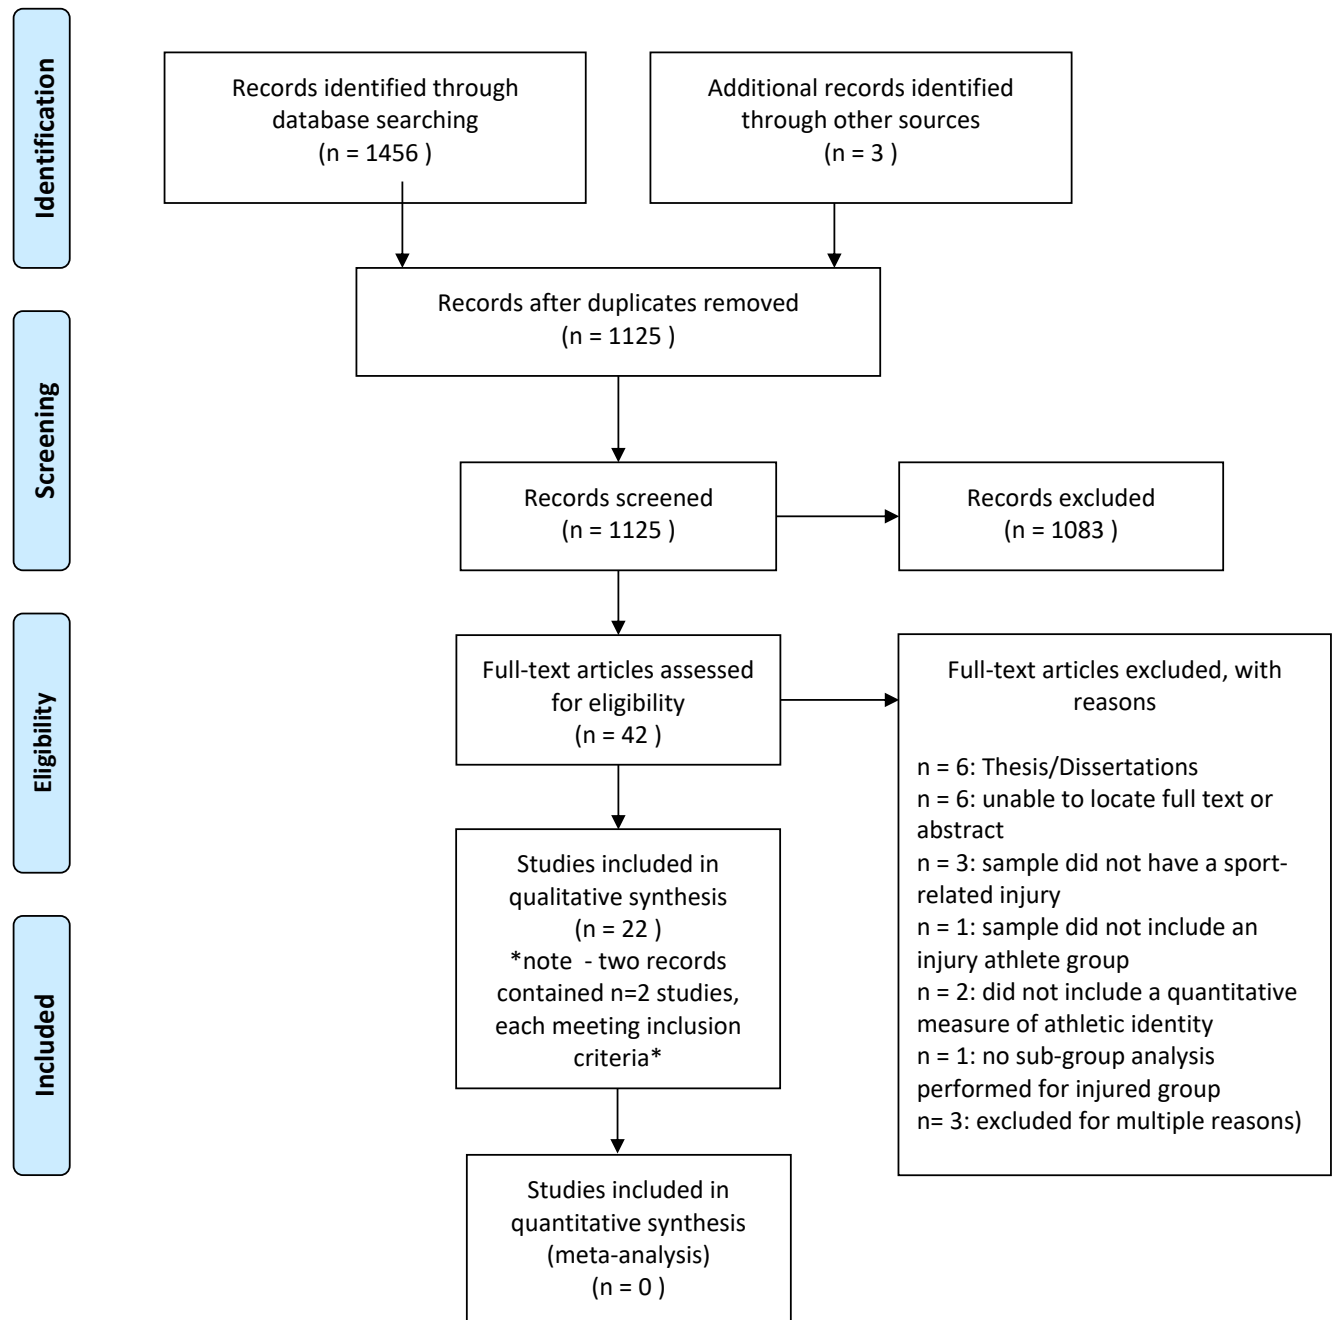

From: Moher D, Liberati A, Tetzlaff J, Altman DG, The PRISMA Group (2009). Preferred Reporting Items for Systematic Reviews and Meta-Analyses: The PRISMA Statement. PLoS Med 6(7): e1000097. doi:10.1371/journal.pmed1000097

For more information, visit [www.prisma-statement.org](http://www.prisma-statement.org).
