# Supplementary material for: Investigating correlates of athletic identity and sport-related injury outcomes: a scoping review
Source: HighWire-hosted journal article supplement (doi:10.1136/bmjopen-2020-044199), 2021-04-01
Supplement: bmjopen-2020-044199supp003_data_supplement.pdf [file bmjopen-2020-044199supp003_data_supplement.pdf]

## Appendix 3

1

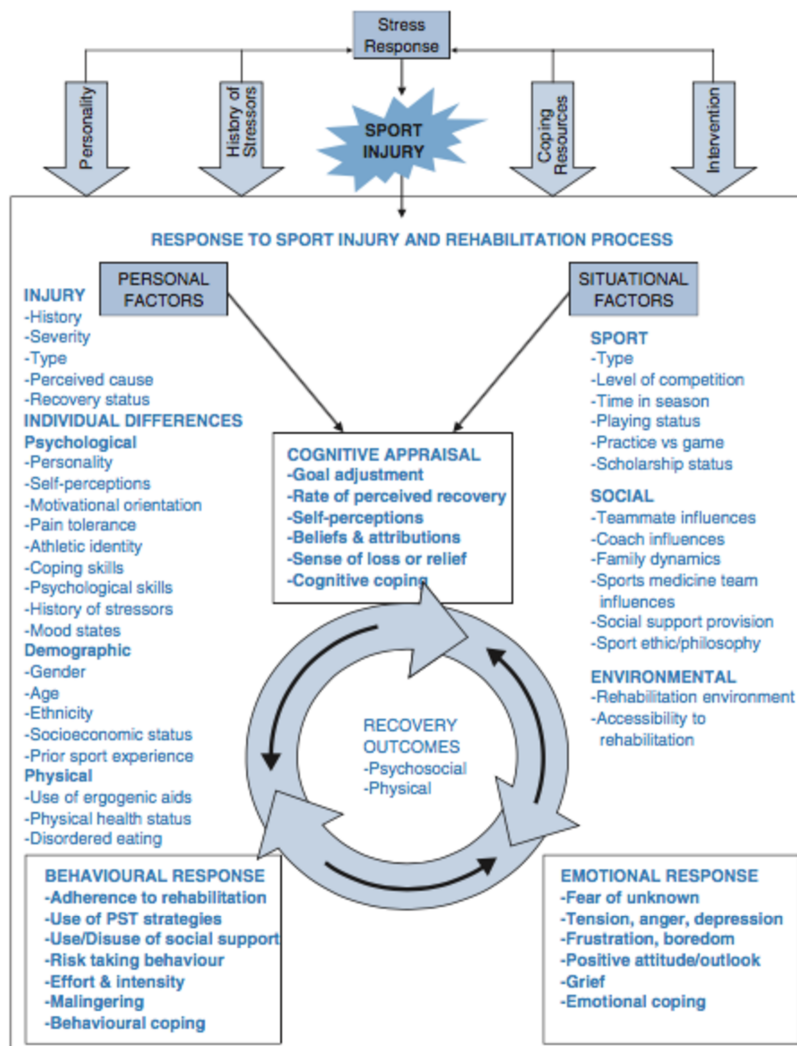

**Figure 2.** Integrated model of psychological response to the sport injury and rehabilitation process (Wiese-Bjornstal et al., 1998)

\*Figure reproduced with permission from the original author\*
